# Supplementary material for: The Influence of Pressure-Swing Conditioning Pre-Treatment of Cattle Manure on Methane Production
Source: MDPI journal article supplement (doi:10.3390/bioengineering7010006), 2019-12-30
Supplement: s1 [file s1]

## Supplementary material

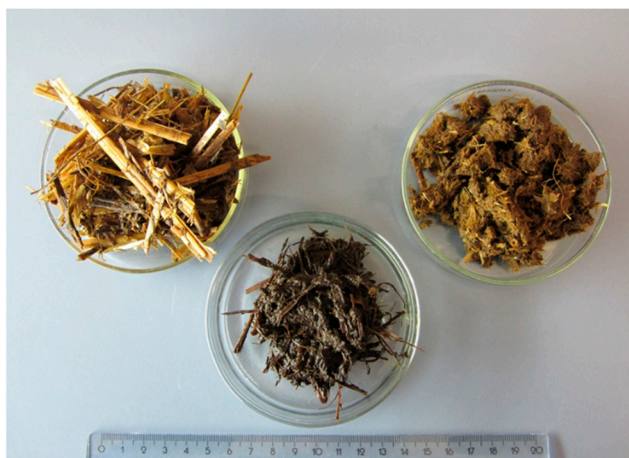

**Figure S1.** Untreated for batch test; PCS-treated for batch /continuous tests, 'Untreated' chopped for continuous test, f.l.t.r. (Source: DBFZ).
